# Supplementary material for: Metal Oxide Wrapped by Reduced Graphene Oxide Nanocomposites as Anode Materials for Lithium-Ion Batteries
Source: Nanomaterials (Basel). 2023 Jan 11;13(2):296. doi: 10.3390/nano13020296 (PMC9865346; doi:10.3390/nano13020296)
Supplement: Supplementary file 1 [file nanomaterials-13-00296-s001.zip › nanomaterials-2148321-supplementary.pdf]

## Supplementary Information

### Metal oxide wrapped by reduced graphene oxide nanocomposites as anode materials for lithium-ion batteries

Junaid Aslam<sup>1</sup>, Yong Wang<sup>1,2\*</sup>

<sup>1</sup> Department of Chemical Engineering, School of Environmental and Chemical Engineering, Shanghai University, 99 Shangda Road, Shanghai 200444, People's Republic of China.

<sup>2</sup> Key Laboratory of Organic Compound Pollution Control Engineering (MOE), Shanghai University, 99 Shangda Road, Shanghai 200444, People's Republic of China

\*Corresponding authors: Tel: +86-21-66137723; fax: +86-21-66137725.

Email address: Yong Wang (yongwang@shu.edu.cn)

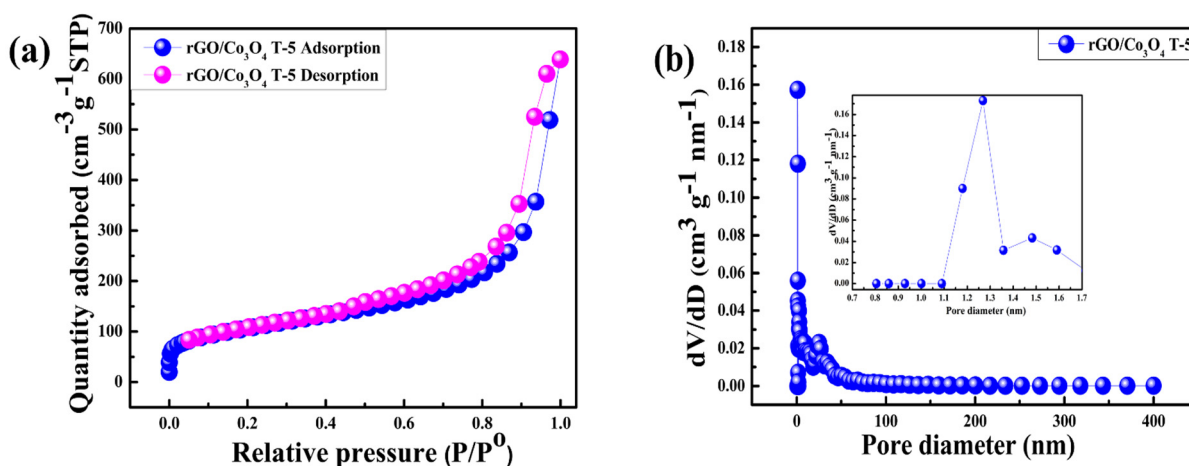

**Figure S1.** (a) Nitrogen adsorption-desorption isotherms of the rGO/Co<sub>3</sub>O<sub>4</sub>T-5 nanocomposite and (b) the corresponding pore-size distribution of the rGO/Co<sub>3</sub>O<sub>4</sub>T-5 nanocomposite.

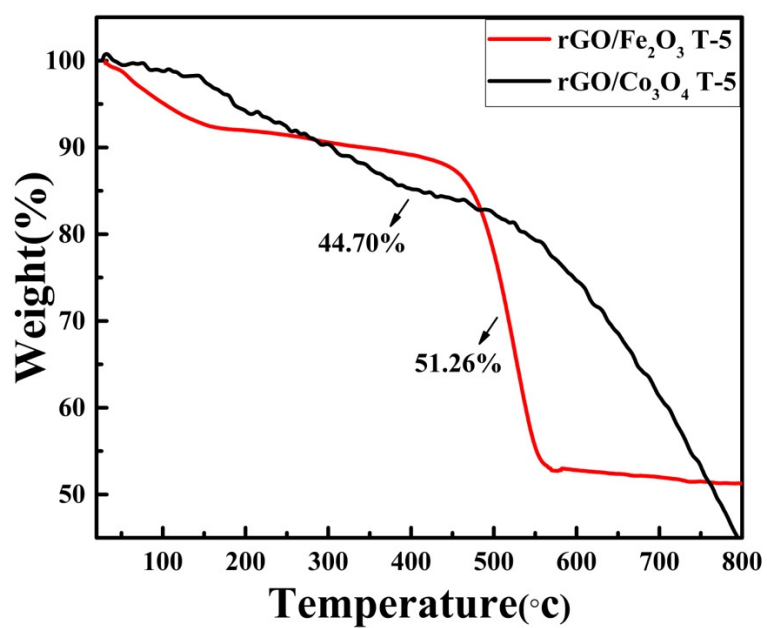

**Figure S2.** The TGA curves of the rGO/Fe<sub>2</sub>O<sub>3</sub>T-5 and rGO/Co<sub>3</sub>O<sub>4</sub>T-5 nanocomposites.

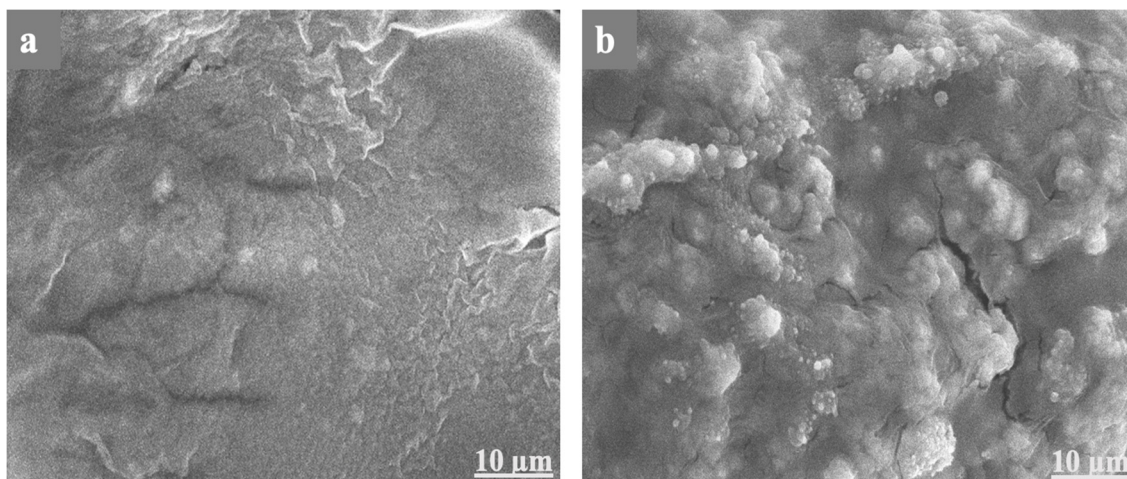

**Figure S3.** (a, b) SEM images of the nanocomposites rGO/Fe<sub>2</sub>O<sub>3</sub>T-5 and the nanocomposite rGO/Co<sub>3</sub>O<sub>4</sub>T-5 alternatively, after 100 charge-discharge cycles.

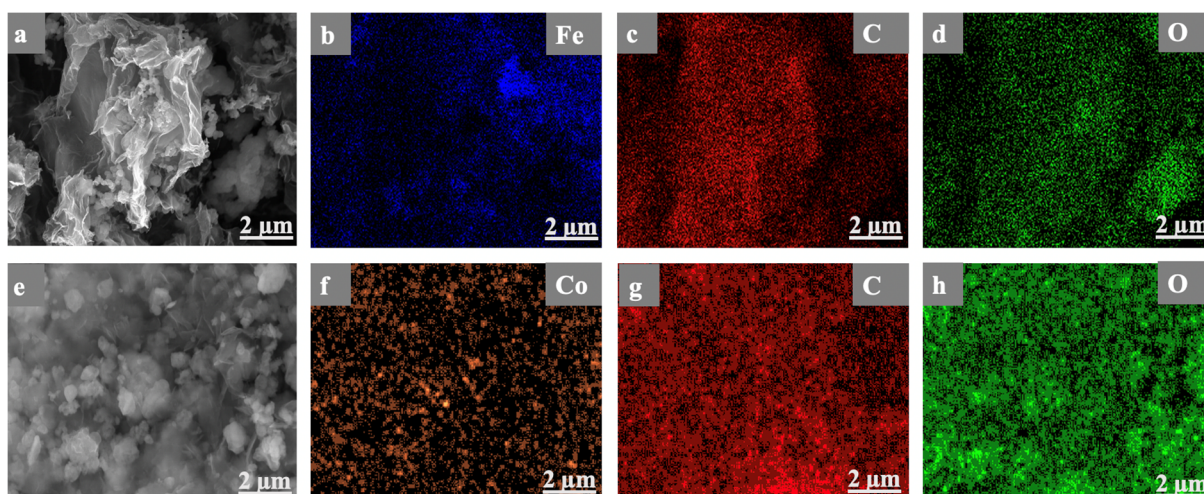

**Figure S4.** (a) SEM image of the nanocomposite rGO/Fe<sub>2</sub>O<sub>3</sub>T-5, and the corresponding elemental mapping of (b) Fe , (c) C, (d) O, (e) SEM image of the nanocomposite rGO/Co<sub>3</sub>O<sub>4</sub>T-5, and the elemental mapping of (f) Co , (g) C, (h) O.

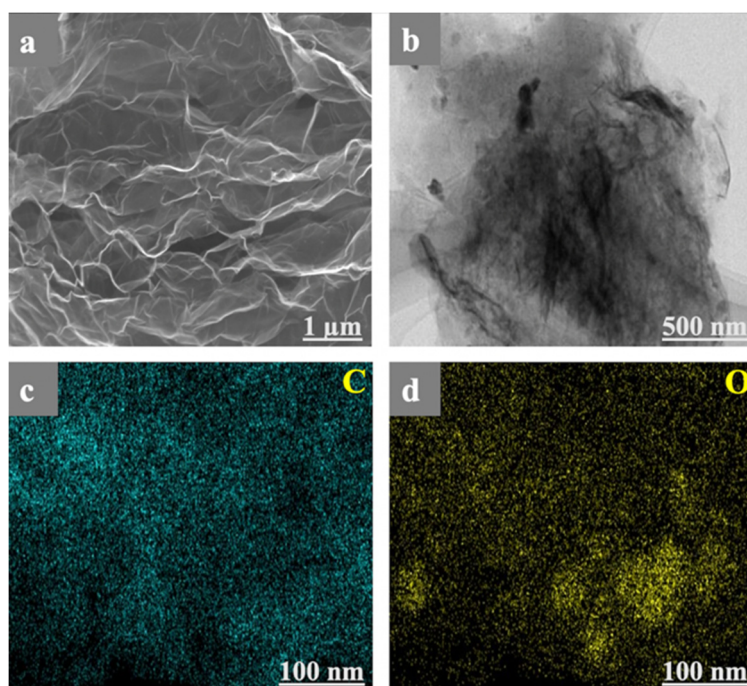

**Figure S5.** (a) SEM image of rGO, (b) TEM image of rGO and the corresponding elemental mapping of (c) C, (d) O.

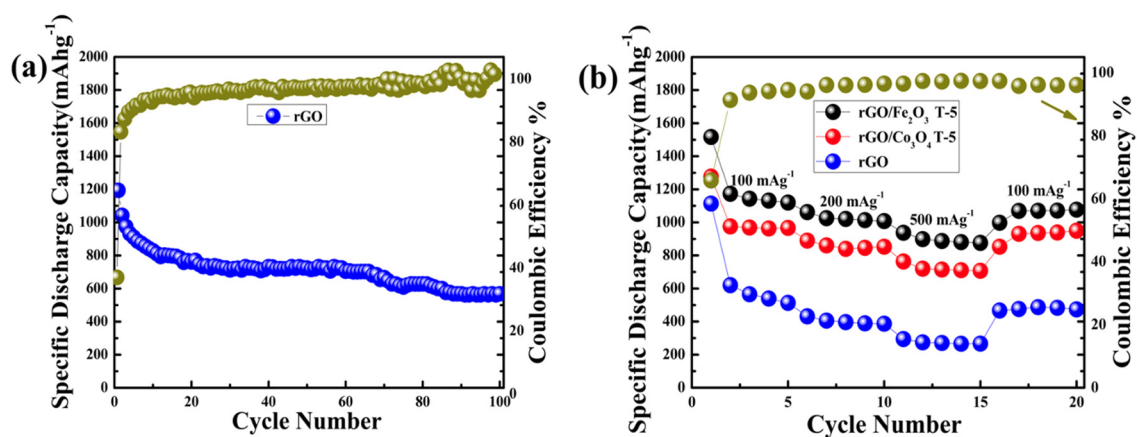

**Figure S6.** (a) Cycling performance and coulombic efficiency of the pristine rGO electrode at 100 mA g<sup>-1</sup> current density during 100 cycles (b) Rate performance and the coulombic efficiencies of the rGO/Fe<sub>2</sub>O<sub>3</sub>T-5, rGO/Co<sub>3</sub>O<sub>4</sub>T-5 and rGO electrodes at various current densities between 100 and 500 mA g<sup>-1</sup>.

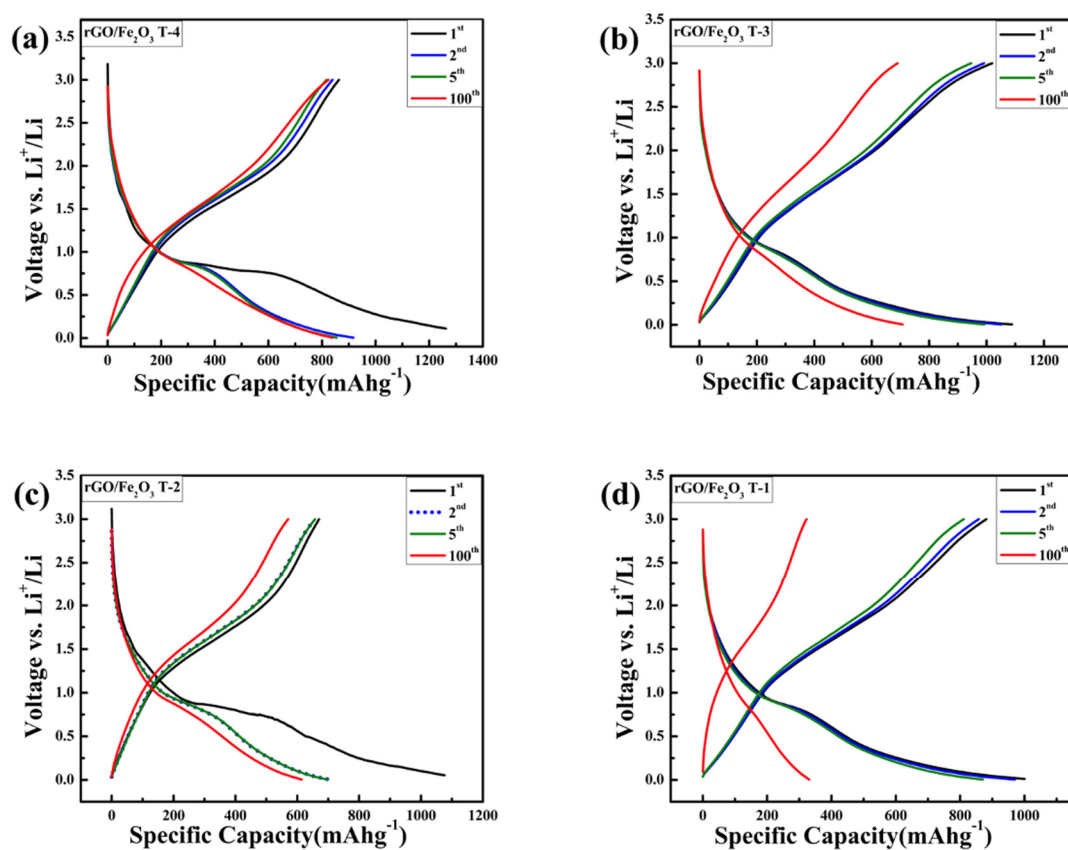

**Figure S7.** Galvanostatic charge-discharge profiles: (a-d) The rGO/Fe<sub>2</sub>O<sub>3</sub> electrodes at 1<sup>st</sup>, 2<sup>nd</sup>, 5<sup>th</sup> and 100<sup>th</sup> cycles with different ratios of rGO and Fe<sub>2</sub>O<sub>3</sub> at the current density of 100 mA g<sup>-1</sup>.

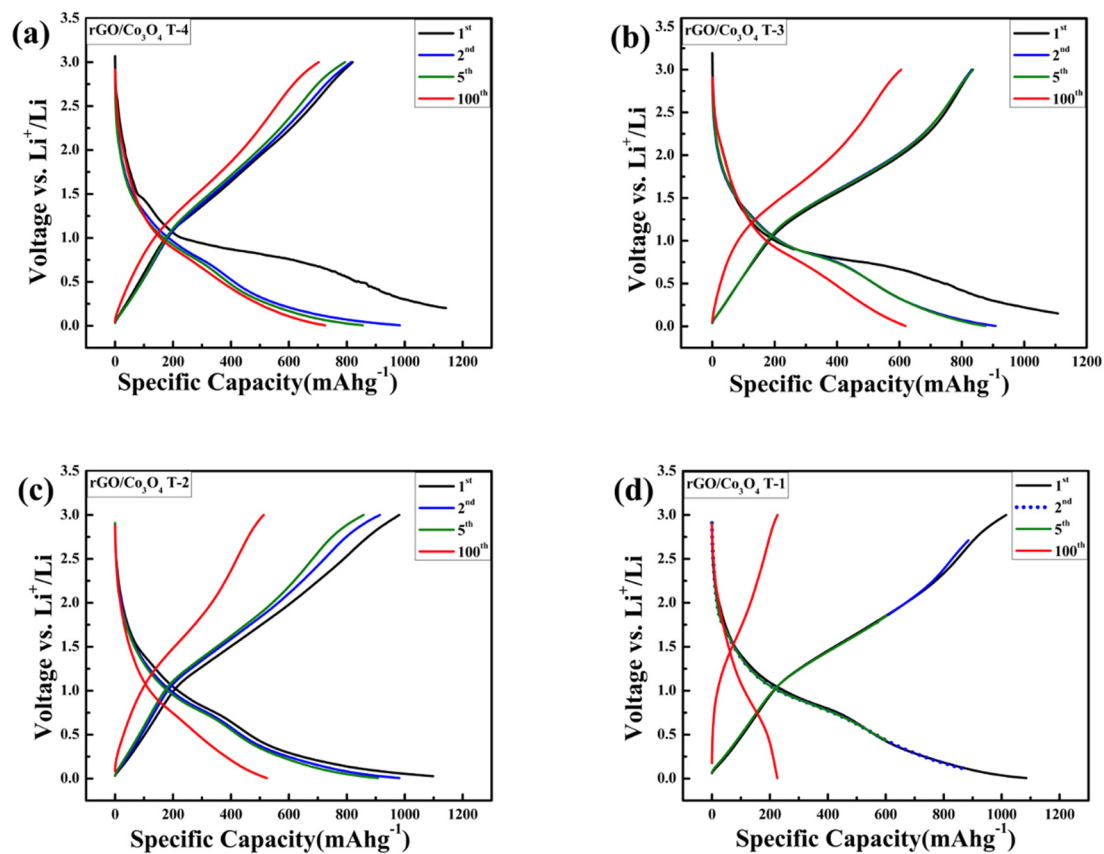

**Figure S8.** Galvanostatic charge-discharge profiles: (a-d) The rGO/Co<sub>3</sub>O<sub>4</sub> electrodes at 1<sup>st</sup>, 2<sup>nd</sup>, 5<sup>th</sup> and 100<sup>th</sup> cycles with different ratios of rGO and Co<sub>3</sub>O<sub>4</sub> at the current density of 100 mA g<sup>-1</sup>.

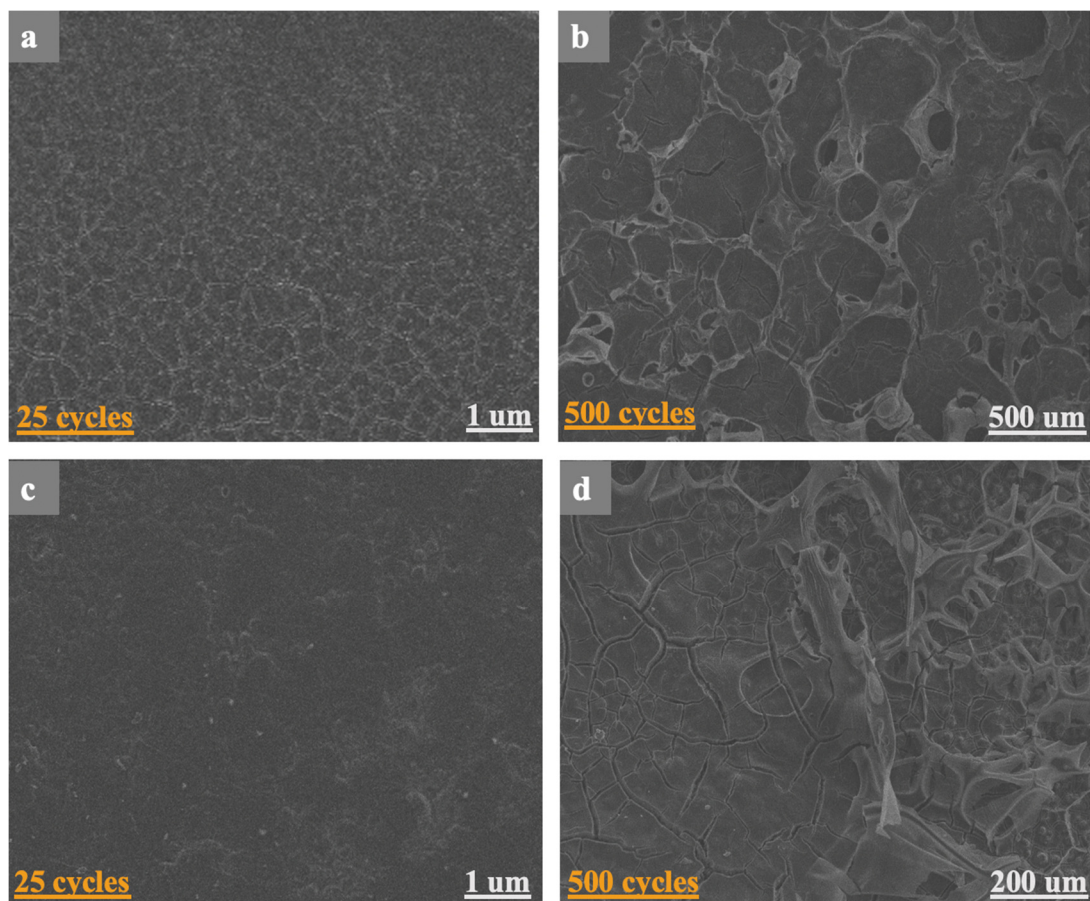

**Figure S9.** (a, b) SEM images of the nanocomposite rGO/Fe<sub>2</sub>O<sub>3</sub>T-5 at a low current density 100 mA g<sup>-1</sup> after 25 cycles and 500 cycles (c, d) SEM images of the nanocomposite rGO/Co<sub>3</sub>O<sub>4</sub>T-5 at a low current density 100 mA g<sup>-1</sup> after 25 cycles and 500 cycles alternatively.

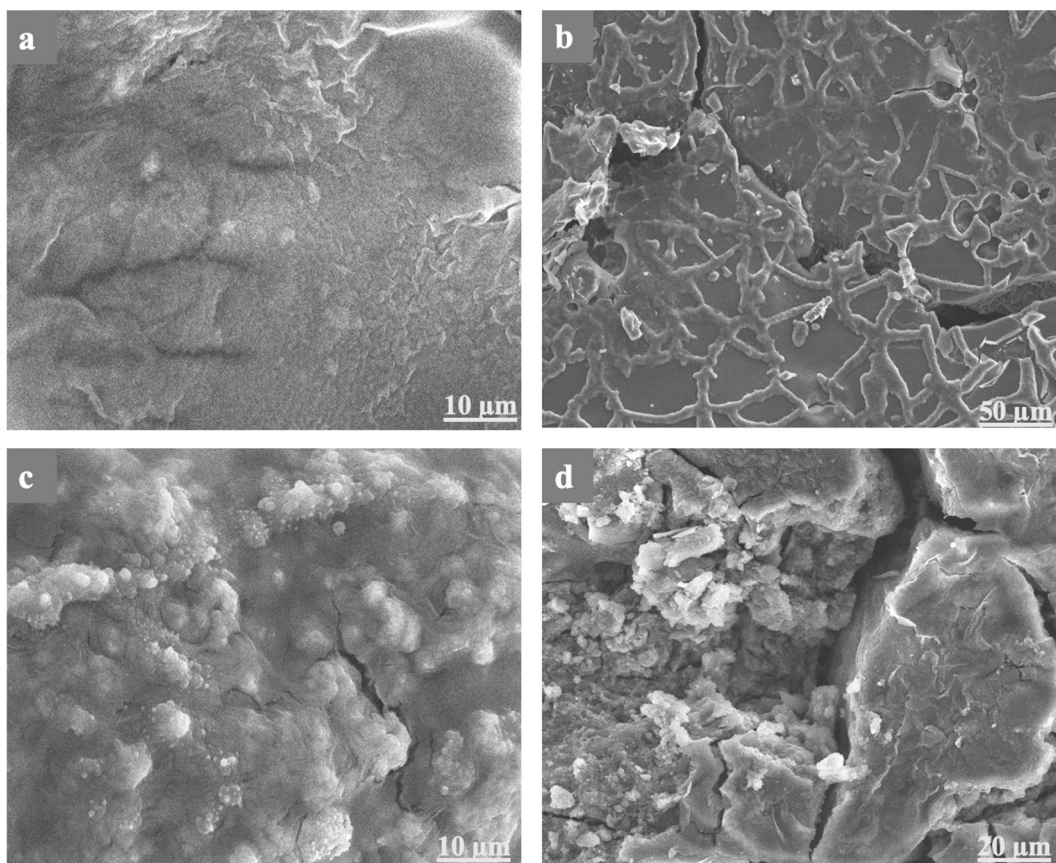

**Figure S10.** (a, b) SEM images of the nanocomposite rGO/Fe<sub>2</sub>O<sub>3</sub>T-5 at low current density 100 mA g<sup>-1</sup> and at high current density 500 mA g<sup>-1</sup> and (c, d) SEM images of the nanocomposite rGO/Co<sub>3</sub>O<sub>4</sub>T-5 at low current density 100 mA g<sup>-1</sup> and at high current density 500 mA g<sup>-1</sup> alternatively, after 100 charge-discharge cycles.

**Table S1.** Comparison of the electrochemical performances of Fe<sub>2</sub>O<sub>3</sub> and Co<sub>3</sub>O<sub>4</sub> based composite anodes and various recently reported electrodes for Li-ion batteries.

| Electrode materials                                                   | Current Density (mA g <sup>-1</sup> ) | Cycle Number (nth) | Reversible Capacity (mAh g <sup>-1</sup> ) | Ref.      |
|-----------------------------------------------------------------------|---------------------------------------|--------------------|--------------------------------------------|-----------|
| $\alpha$ -Fe <sub>2</sub> O <sub>3</sub> nanofiber                    | 60                                    | 40                 | 1293                                       | [1]       |
| $\alpha$ - Fe <sub>2</sub> O <sub>3</sub> nanocapsules                | 0.1                                   | 30                 | 740                                        | [2]       |
| Fe <sub>2</sub> O <sub>3</sub> @C composites                          | 200                                   | 100                | 600                                        | [3]       |
| RG-O/Fe <sub>2</sub> O <sub>3</sub> composite                         | 100                                   | 50                 | 1027                                       | [4]       |
| Co <sub>3</sub> O <sub>4</sub> /RGO                                   | 100                                   | 100                | 96.36                                      | [5]       |
| Co <sub>3</sub> O <sub>4</sub> -graphene sheet-on-sheet nanocomposite | 89                                    | 30                 | 1065                                       | [6]       |
| Co <sub>3</sub> O <sub>4</sub> /graphene                              | 0.05                                  | 30                 | 935                                        | [7]       |
| Mesoporous Co <sub>3</sub> O <sub>4</sub> /Graphene                   | 100                                   | 35                 | 820                                        | [8]       |
| Co <sub>3</sub> O <sub>4</sub> /graphene                              | 100                                   | 50                 | 840                                        | [9]       |
| Co <sub>3</sub> O <sub>4</sub> fibers/graphene                        | 100                                   | 40                 | 840                                        | [10]      |
| rGO/Fe <sub>2</sub> O <sub>3</sub> T-5                                | 100                                   | 100                | 1021                                       | This Work |
| rGO/ Co <sub>3</sub> O <sub>4</sub> T-5                               | 100                                   | 100                | 773                                        | This Work |

## References:

1. S. Chaudhari and M. Srinivasan, "1D hollow  $\alpha$ -Fe<sub>2</sub>O<sub>3</sub> electrospun nanofibers as high performance anode material for lithium ion batteries," *Journal of Materials Chemistry*, vol. 22, no. 43, pp. 23049-23056, 2012.
2. H. S. Kim, Y. Piao, S. H. Kang, T. Hyeon and Y.-E. Sung, "Uniform hematite nanocapsules based on an anode material for lithium ion batteries," *Electrochemistry communications*, vol. 12, no. 3, pp. 382-385, 2010.
3. F. Han, D. Li, W. C. Li, C. Lei, Q. Sun and A. H. Lu, "Nanoengineered polypyrrole-coated Fe<sub>2</sub>O<sub>3</sub>@C multifunctional composites with an improved cycle stability as lithium-ion anodes," *Advanced Functional Materials*, vol. 23, no. 13, pp. 1692-1700, 2013.
4. X. Zhu, Y. Zhu, S. Murali, M. D. Stoller and R. S. Ruoff, "Nanostructured reduced graphene oxide/Fe<sub>2</sub>O<sub>3</sub> composite as a high-performance anode material for lithium ion batteries," *ACS nano*, vol. 5, no. 4, pp. 3333-3338, 2011.
5. D. Pan, S. Wang, B. Zhao, M. Wu, H. Zhang, Y. Wang and Z. Jiao, "Li storage properties of disordered graphene nanosheets," *Chemistry of Materials*, vol. 21, no. 14, pp. 3136-3142, 2009.
6. S. Q. Chen and Y. Wang, "Microwave-assisted synthesis of a Co<sub>3</sub>O<sub>4</sub>-graphene sheet-on-sheet nanocomposite as a superior anode material for Li-ion batteries," *Journal of Materials Chemistry*, vol. 20, no. 43, pp. 9735-9739, 2010.
7. Z.-S. Wu, G. Zhou, L.-C. Yin, W. Ren, F. Li and H.-M. Cheng, "Graphene/metal oxide composite electrode materials for energy storage," *Nano Energy*, vol. 1, no. 1, pp. 107-131, 2012.
8. X. Yang, K. Fan, Y. Zhu, J. Shen, X. Jiang, P. Zhao and C. Li, "Tailored graphene-encapsulated mesoporous Co<sub>3</sub>O<sub>4</sub> composite microspheres for high-performance lithium ion batteries," *Journal of Materials Chemistry*, vol. 22, no. 33, pp. 17278-17283, 2012.
9. X. Chi, L. Chang, D. Xie, J. Zhang and G. Du, "Hydrothermal preparation of Co<sub>3</sub>O<sub>4</sub>/graphene composite as anode material for lithium-ion batteries," *Materials Letters*, vol. 106, pp. 178-181, 2013.
10. X. Yang, K. Fan, Y. Zhu, J. Shen, X. Jiang, P. Zhao, S. Luan and C. Li, "Electric papers of graphene-coated Co<sub>3</sub>O<sub>4</sub> fibers for high-performance lithium-ion batteries," *ACS applied materials & interfaces*, vol. 5, no. 3, pp. 997-1002, 2013.
